# Supplementary material for: Ectopic expression of transcription factor BATF3 induces B-cell lymphomas in a murine B-cell transplantation model
Source: PubMed Central journal article supplement (PMC5882309; doi:10.18632/oncotarget.24639), 2018-03-23
Supplement: oncotarget-09-15942-s001.pdf [file oncotarget-09-15942-s001.pdf]

## Ectopic expression of transcription factor BATF3 induces B-cell lymphomas in a murine B-cell transplantation model

### SUPPLEMENTARY MATERIALS

### REFERENCES

- Schambach A, Wodrich H, Hildinger M, Bohne J, Kräusslich HG, Baum C. Context dependence of different modules for posttranscriptional enhancement of gene expression from retroviral vectors. *Mol Ther J Am Soc Gene Ther.* 2000; 2: 435–45. <https://doi.org/10.1006/mthe.2000.0191>.
- Weber K, Bartsch U, Stocking C, Fehse B. A multicolor panel of novel lentiviral “gene ontology” (LeGO) vectors for functional gene analysis. *Mol Ther J Am Soc Gene Ther.* 2008; 16: 698–706. <https://doi.org/10.1038/mt.2008.6>.

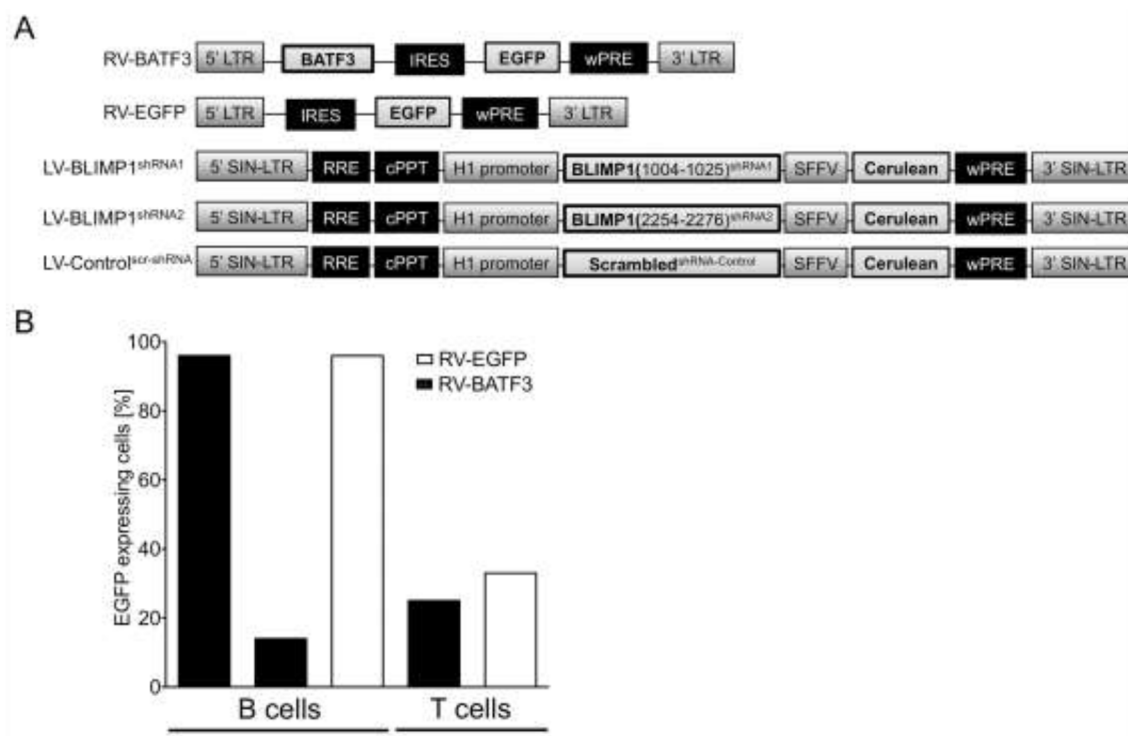

**Supplementary Figure 1: Design of the retroviral vectors used in this study and transduction efficiencies of primary murine T and B cells. (A)** The cDNA of the human *BATF3* gene was cloned into the gammaretroviral vector MP91-EGFP [1]. Sequences of *BLIMP1*-specific shRNAs and a non-specific scrambled control-shRNA were cloned into the lentiviral vector LeGO-Cer [2]. Targeted *BLIMP1*-sequences of shRNA1 and shRNA2 depicted in brackets. RV, gammaretroviral vector; LV, lentiviral vector; EGFP, enhanced green fluorescent protein; LTR, long terminal repeat; SIN-LTR, self-inactivating long terminal repeat; IRES, internal ribosomal entry site; RRE, Rev response element; cPPT, central polypurine tract; SFFV, spleen focus-forming virus; wPRE, woodchuck hepatitis virus posttranscriptional regulatory element. **(B)** Gene marking of transplanted mature T and B cells after retroviral transduction with RV-Batf3 or control-gene encoding vector RV-EGFP. For B cells a highly *BATF3*-transduced and a low *BATF3*-transduced transplant was prepared.

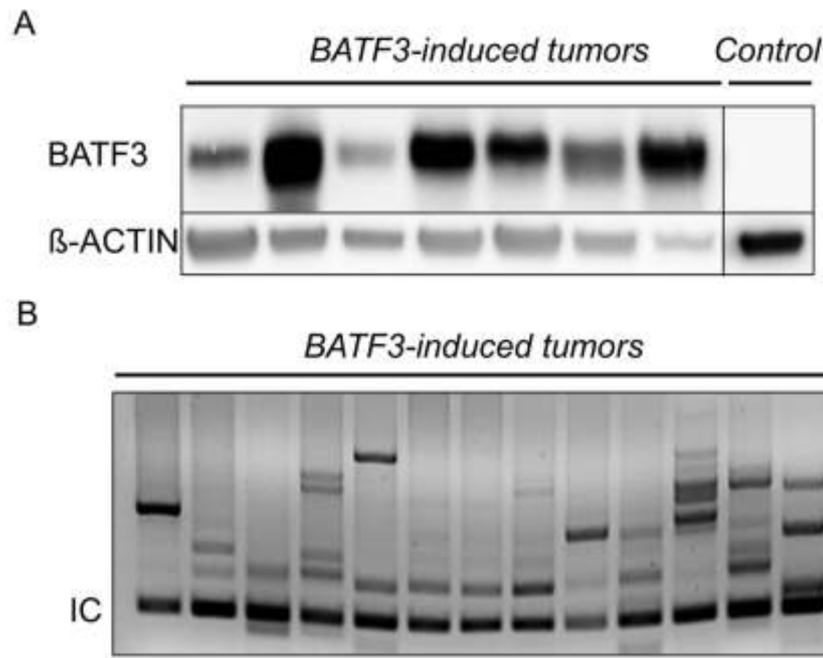

**Supplementary Figure 2: BATF3 expression induced oligoclonal B-cell tumors.** (A) Western blot of several BATF3-induced murine lymphomas demonstrated variable BATF3-expression levels. *In vivo* expanded and sorted B cells from the EGFP-control cohort served as negative control. (B) Retroviral integration analyses of BATF3-induced tumor material via LM-PCR. Every band represents a different integration site in the mouse genome. IC, internal control from vector sequence.

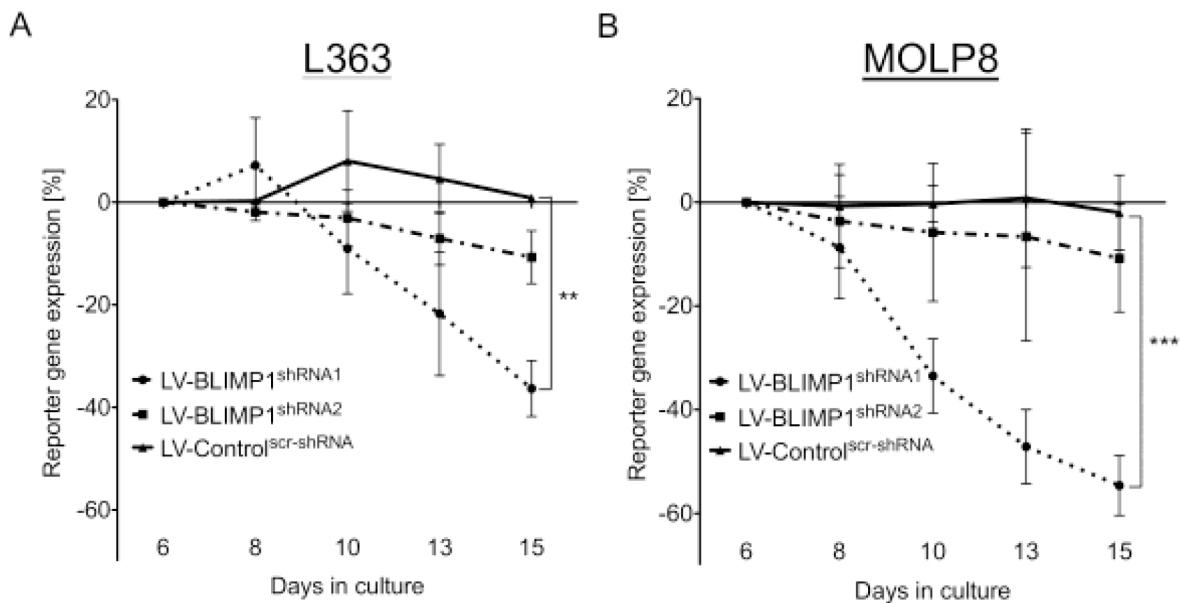

**Supplementary Figure 3: Targeted knockdown of BLIMP1 in multiple myeloma cell lines MOLP8 and L363.** Multiple myeloma cell lines L363 (A) and MOLP8 (B) were either transduced with two different BLIMP1-targeting shRNAs (BLIMP1<sup>shRNA1</sup> and BLIMP1<sup>shRNA2</sup>) or a non-specific, scrambled shRNA as control (Control<sup>[scr-shRNA]</sup>). After two weeks of culture, BLIMP1-specific knockdown with shRNA1 resulted in a dramatically impaired cell expansion of reporter gene expressing cells in both cell lines. Data from three independent experiments are shown. Error bars represent standard deviation. Statistical significance was established with a paired *t* test. \*\*,  $P < 0.01$ , \*\*\*,  $P < 0.0001$

**Supplementary Table 1: Phenotype of transplanted cells**

| <b>Group</b> | <b>CD19/B220<br/>double positive</b> | <b>GL7/Fas double<br/>positive</b> | <b>CXCR4</b> | <b>CXCR5</b> | <b>IgM</b> | <b>IgD</b> | <b>IgG</b> | <b>Igλ</b> | <b>Igκ</b> | <b>CD86</b> | <b>CD83</b> |
|--------------|--------------------------------------|------------------------------------|--------------|--------------|------------|------------|------------|------------|------------|-------------|-------------|
| RV-<br>EGFP  | 99.2                                 | 99.8                               | 21.0         | 82.2         | 88.9       | 74.3       | 10.2       | 17.6       | 81.0       | 97.5        | 52.0        |
| RV-<br>BATF3 | 98.7                                 | 98.9                               | 18.9         | 80.1         | 92.8       | 72.1       | 11.8       | 21.1       | 75.4       | 96.1        | 57.7        |

**Supplementary Table 2: Primers for amplification of the coding sequence of *BATF3***

| <b>Primer</b> | <b>Sequence 5' → 3'</b>       |
|---------------|-------------------------------|
| EX1 FW1       | TGC GGC ACG AGG ATG CC        |
| EX1 FW2       | TAG GCA GCC CCA CGG GC        |
| EX1 RV1       | CTG GAG TTC CGT GGT GGT GA    |
| EX1 RV2       | GGA GAC AAG CAG AGG TAG GG    |
| EX2 FW1       | GGT GCT GTC TAC TGC AAA GC    |
| EX2 FW2       | AGA AAA GGG TAA GGC GAG G     |
| EX2 RV1       | CTA ATT TCT GCC AGG TCC TTC C |
| EX2 RV2       | CTG AGT GCT TCT CAT GGT CA    |
| EX3 FW1       | GCT TTC ATG GGC AAG AGG TG    |
| EX3 FW2       | GAG GAA GGG AAC GCT GC        |
| EX3 RV1       | CTC AGC CCG ACA TCC AAC A     |
| EX3 RV2       | AGA TCC AGC ATG GAG GCC A     |

EX, exon; FW, forward primer; RV, reverse primer.
